# Supplementary material for: Synthesis of “amphiphilic” carbon dots and their application for the analysis of iodine species (I2, I− and IO3−) in highly saline water
Source: Royal Society of Chemistry journal article supplement (doi:10.1039/c5an02643a), 2016-01-01
Supplement: c5an02643a1.pdf [file c5an02643a1.pdf]

## Synthesis of “amphiphilic” carbon dots and their applications for the analysis of iodine species ( $I_2$ , $I^-$ and $IO_3^-$ ) in high saline water

Meina Wang,<sup>a</sup> Baozhan Zheng,<sup>\*a</sup> Feng Yang,<sup>a</sup> Juan Du,<sup>a</sup> Yong Guo,<sup>a</sup> Jianyuan Dai,<sup>a</sup>  
Lei Yan,<sup>c</sup> Dan Xiao<sup>\*a,b</sup>

<sup>a</sup> Department of Chemistry, Sichuan University, No. 29 Wangjiang Road, Chengdu 610064,  
China.

<sup>b</sup> Department of Chemical Engineering, Sichuan University, No. 29 Wangjiang Road, Chengdu  
610064, China.

<sup>c</sup> School of Criminal Investigation, Southwest University of Political Science and Law, No. 301,  
Baosheng Ave, Yubei District, Chongqing 401120, China.

\* Corresponding author: xiaodan@scu.edu.cn (D. Xiao); zhengbaozhan@scu.edu.cn (B. Z.  
Zheng).

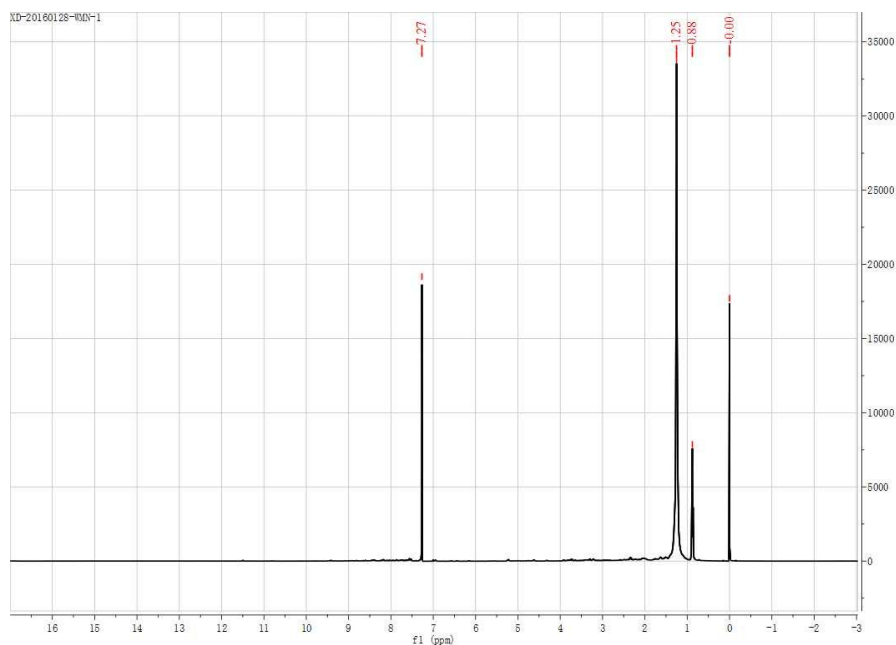

Fig. S1 The <sup>1</sup>H NMR spectrum of A-CDs.

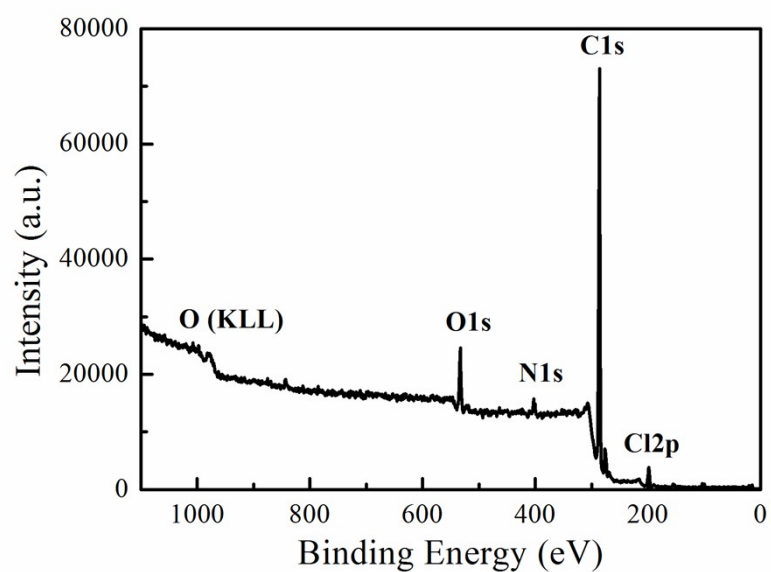

**Fig. S2** The XPS spectrum of A-CDs.

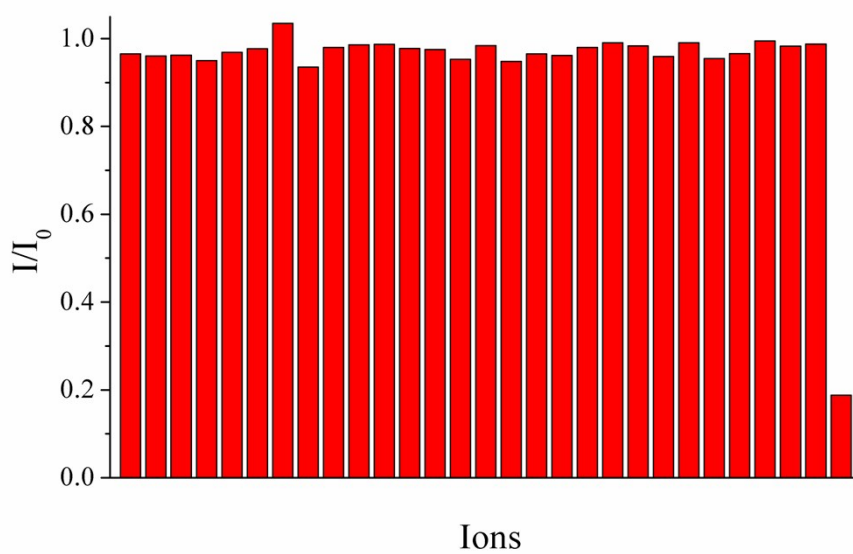

**Fig.S3** The response of A-CDs to 29 kinds of ions (from left to right:  $\text{Ag}^+$ ,  $\text{Al}^{3+}$ ,  $\text{Ba}^{2+}$ ,  $\text{Ca}^{2+}$ ,  $\text{Cd}^{2+}$ ,  $\text{Co}^{2+}$ ,  $\text{Cr}^{3+}$ ,  $\text{Cu}^{2+}$ ,  $\text{Fe}^{3+}$ ,  $\text{K}^+$ ,  $\text{Hg}^{2+}$ ,  $\text{Mg}^{2+}$ ,  $\text{Mn}^{2+}$ ,  $\text{Ni}^{2+}$ ,  $\text{Pb}^{2+}$ ,  $\text{Zn}^{2+}$ ,  $\text{F}^-$ ,  $\text{Cl}^-$ ,  $\text{Br}^-$ ,  $\text{S}^{2-}$ ,  $\text{ClO}_4^-$ ,  $\text{SO}_4^{2-}$ ,  $\text{NO}_3^-$ ,  $\text{NO}_2^-$ ,  $\text{C}_6\text{H}_5\text{O}_7^{3-}$ ,  $\text{CH}_3\text{COO}^-$ ,  $\text{IO}_3^-$ ,  $\text{I}^-$ ,  $\text{I}_2$ ).

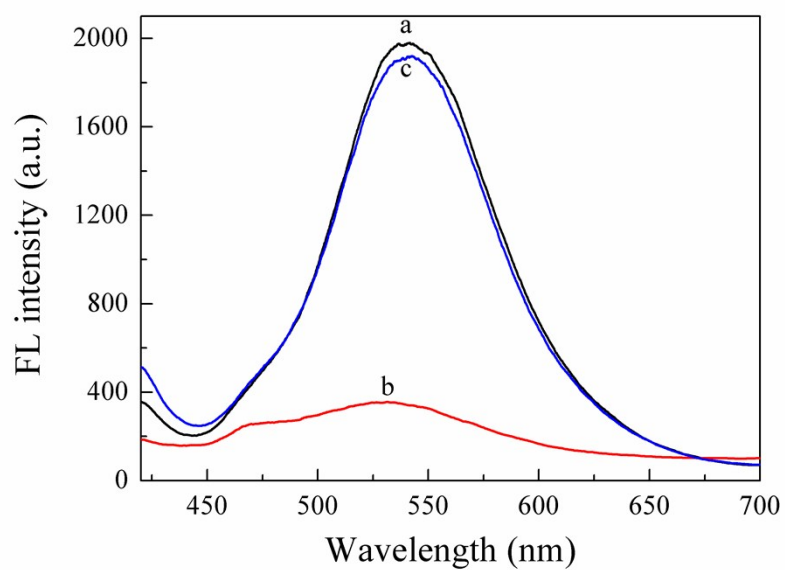

**Fig.S4** Fluorescence intensity of A-CDs changes before (curve a) and after (curve b) adding  $I_2$ , and the fluorescence recovery after the addition of excess  $Na_2SO_3$  (curve c).

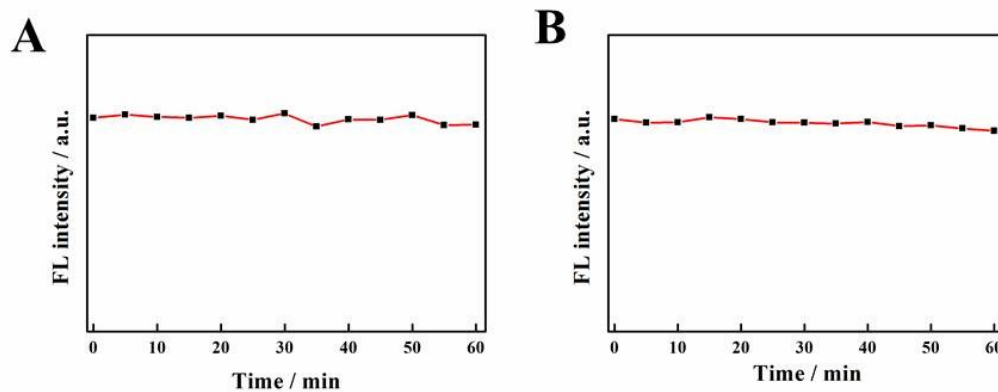

**Fig.S5** The influence of  $Na_2SO_3$  (A) and  $H_2O_2$  (B) on the fluorescence intensity of A-CDs. ( $[Na_2SO_3] = 0.5 \text{ mM}$ ;  $[H_2O_2] = 50 \text{ mM}$ ).

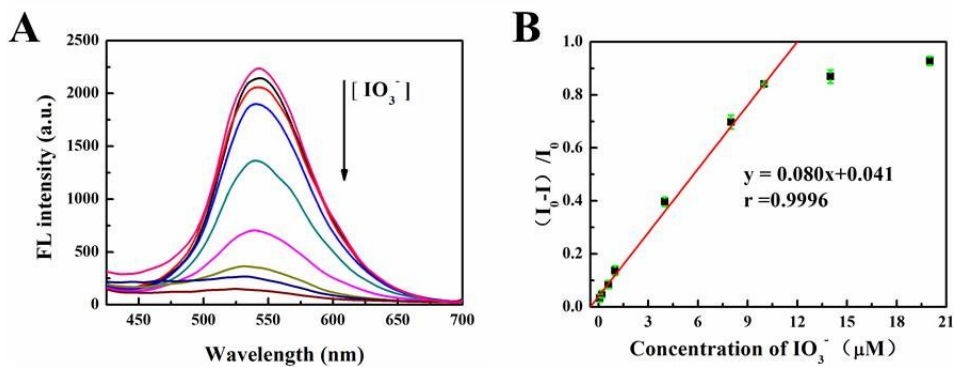

Fig.S6 (A) The fluorescence spectra changes of A-CDs upon the addition of  $\text{IO}_3^-$  (80 nM-20  $\mu\text{M}$ ) in aqueous solution with an excitation at 360 nm at pH=1.0; (B) show the plots of relative fluorescence  $(I_0 - I)/I_0$  versus the concentration of  $\text{IO}_3^-$  (Error bars, SD, n=3).

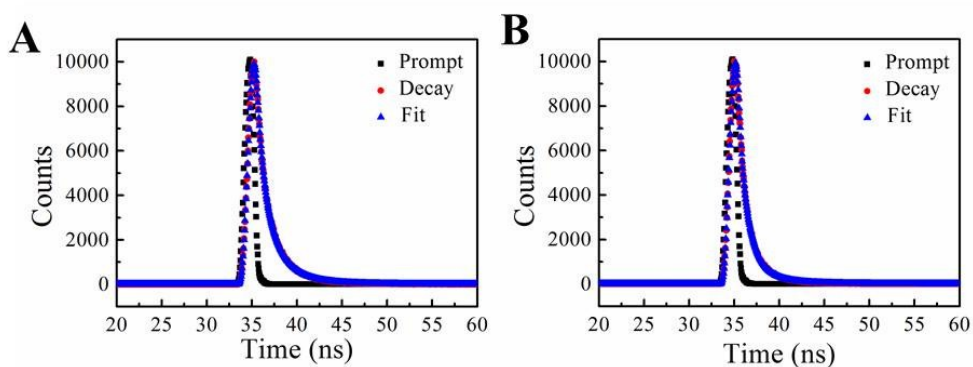

Fig.S7 The fluorescence lifetime of A-CDs before (A) and after (B) the presence of  $\text{I}_2$ .

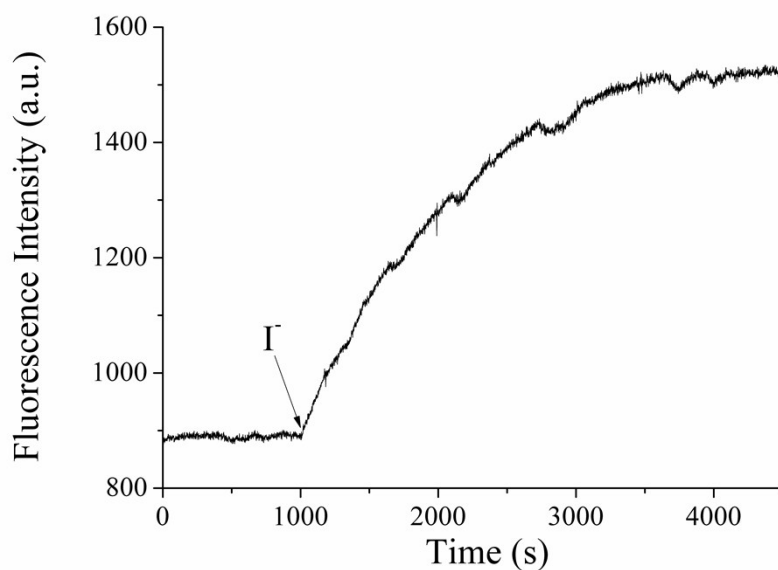

**Fig.S8** The fluorescence intensity changes of A-CDs after the addition of excess  $I^-$  into the system of A-CDs- $I_2$

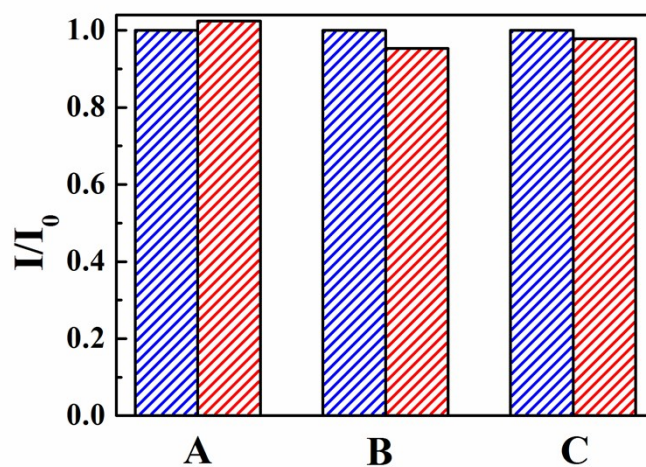

**Fig.S9** The response of hydrophilic carbon dots to  $I_2$ , the carbon dots was synthesized from sucrose,<sup>1</sup> and only with hydrophilic groups (-OH and -COOH) on the surface. A, B and C refer to the response of hydrophilic carbon dots to  $I_2$ ,  $I^-$  and  $IO_3^-$  ( $10^{-5}$  M), respectively; blue and red columns are fluorescence signal changes before and after the addition of  $I_2$ ,  $I^-$  and  $IO_3^-$  in the system, respectively.

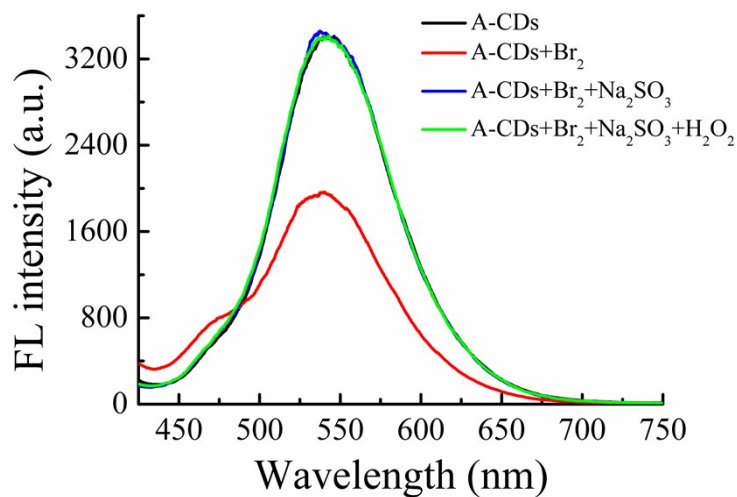

Fig.S10 The fluorescent spectrum of A-CDs (black curve), A-CDs with  $\text{Br}_2$  present (red curve), A-CDs with  $\text{Br}_2$  and  $\text{Na}_2\text{SO}_3$  present (blue curve), A-CDs with  $\text{Br}_2$ ,  $\text{Na}_2\text{SO}_3$  and  $\text{H}_2\text{O}_2$  present (green curve). The concentration of  $\text{Br}_2$  is  $10^{-5}$  M.

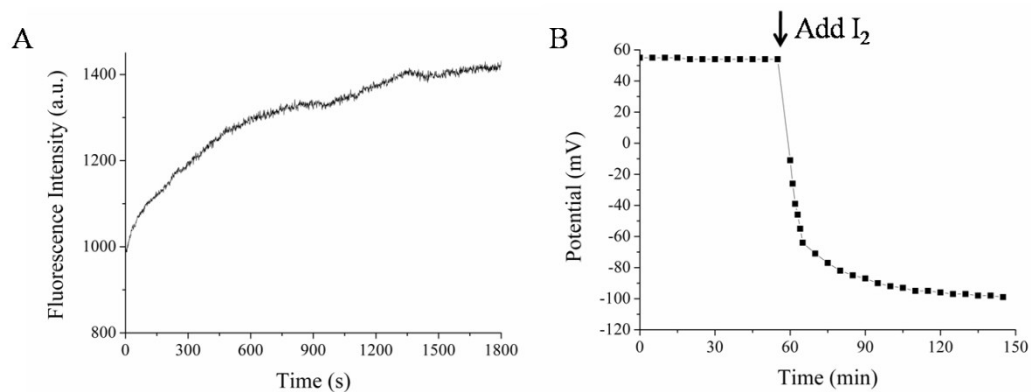

**Fig.S11** (A) The fluorescence recovery of A-CDs with time extension with the present of  $\text{I}_2$  in the system; (B) the measurement of  $\text{I}^-$  in the system with iodide ion selective electrode.

Table S1. The zeta potentials of A-CDs in water at different pH.

|                     |      |      |      |      |      |
|---------------------|------|------|------|------|------|
| pH                  | 1.0  | 2.0  | 4.0  | 7.0  | 10.0 |
| Zeta potential (mV) | 24.9 | 48.1 | 46.9 | 29.9 | 15.7 |

Table S2. The zeta potentials of A-CDs in water with the presence of Na<sub>2</sub>SO<sub>3</sub> and H<sub>2</sub>O<sub>2</sub> (pH=1).

| Concentration                   |        | Zeta potential (mV) |
|---------------------------------|--------|---------------------|
| Na <sub>2</sub> SO <sub>3</sub> | 10 mM  | 29.3                |
|                                 | 5 mM   | 26.8                |
|                                 | 1 mM   | 22.5                |
| H <sub>2</sub> O <sub>2</sub>   | 0.1 M  | 23.8                |
|                                 | 0.05 M | 23.2                |
|                                 | 0.01 M | 24.1                |

**Table S3.** Determination of iodine in brine water, urine and edible saltsamples

| Samples     | Measuringiodine (mg/L) (n=3) | Spiked (mg/L ) | Found(mg/L ) (n=3) | Recovery (%) | Iodine content of stock solution | Standard range            |
|-------------|------------------------------|----------------|--------------------|--------------|----------------------------------|---------------------------|
| Brine water | 0.337±0.001                  | 0.127          | 0.462±0.005        | 98           | 1.35mg/L                         | 1.2-1.6 mg/L <sup>a</sup> |
| Urine       | 0.130±0.003                  | 0.127          | 0.258±0.002        | 101          | 0.130 mg/L                       | 100-200 µg/L <sup>b</sup> |
| Edible salt | 0.261±0.001                  | 0.127          | 0.389±0.003        | 101          | 26.1mg/kg                        | 21-39 mg/kg <sup>c</sup>  |

<sup>a</sup> The data from Jinlu Corporation Ltd., Sichuan, China.

<sup>b</sup> For a healthy human being, urinary iodide should be in the range of 100-200µg/L according to the WHO.

<sup>c</sup> Iodine content of the standard range of products.

## References:

1. S. Chandra, P. Das, S. Bag, Laha,D. and P. Pramanik, *Nanoscale*, 2011,**3**, 1533.
